# Supplementary material for: A conservative resource use strategy in agricultural grasslands counteracts lower productivity and water use efficiency under drought conditions
Source: Copernicus journal article supplement (doi:10.5194/egusphere-2024-2435), 2024-08-12
Supplement: Supplementary file 1 [file egusphere-2024-2435-supplement.pdf]

1 **A conservative resource use strategy in agricultural grasslands counteracts lower**  
2 **productivity and water use efficiency under drought conditions**

3 Elena Tello-García<sup>1\*</sup>, Erich Tasser<sup>1,2</sup>, Ursula Peintner<sup>3</sup>, Ulrike Tappeiner<sup>1</sup>, Georg Leitinger<sup>1</sup>

4 <sup>1</sup> Department of Ecology, Universität Innsbruck, 6020 Innsbruck, Austria

5 <sup>2</sup> Eurac research, Institute for Alpine Environment, 39100 Bozen, Italy

6 <sup>3</sup> Department of Microbiology, Universität Innsbruck, 6020 Innsbruck, Austria

7 \*Correspondence to: Elena Tello-García ([elena.tello-garcia@uibk.ac.at](mailto:elena.tello-garcia@uibk.ac.at))

8

9 **Soil characterization**

10 *Methods*

11 Soil samples from a depth of 0-0.15 m were collected at three randomly selected locations per  
12 lysimeter, and these were then pooled to form a mix sample (approximately 500 g). These mix  
13 samples were air-dried, and sieved through a 2-mm sieve. Soil pH was measured  
14 potentiometrically in a solution of 0.01 M CaCl<sub>2</sub> (Thomas, 1996). Soil organic matter (SOM)  
15 was determined by weight loss after ignition in a muffle furnace at 550°C for 7 hours  
16 (Schlichting and Blume, 1995). The soil texture was measured with an automated particle size  
17 analyser (PARIO; Meter Group; Munich, Germany). Before the analysis, 30 g of air-dried soil  
18 from each lysimeter were treated with 30 % H<sub>2</sub>O<sub>2</sub> to remove organic matter and were  
19 chemically (0.15 M Na<sub>4</sub>P<sub>2</sub>O<sub>7</sub>) and mechanically (shaker) dispersed. The resulting suspension  
20 was analysed by PARIO, which calculates the particle size distribution by Stoke's law with a  
21 range spanning from 0.002 to 0.063 mm and provides a particle size distribution curve. Then,  
22 the suspension was flushed onto a cascaded sieve to obtain the particles between 0.063 and 2  
23 mm. Particles smaller than 0.002 mm were calculated from the residual (i.e., unrecovered)  
24 mass. Particles were divided according to their size into sand ('large', 0.063 - 2 mm), silt  
25 ('medium', 0.002 - 0.063 mm) and clay ('small', < 0.002 mm) (after DIN 4022).

26

27 *Results*

28 Regarding soil parameters, SOM significantly decreased in all lysimeters by the end of the  
29 experiment from 6.03 ± 0.07 % to 4.88 ± 0.07 % (ANOVA, F = 240.408, p < 0.001), but no  
30 differences were seen between grassland types or irrigation levels. Soil pH (7.24 ± 0.03) did  
31 not change during the experiment. The analysis of soil particle size distribution revealed a sandy  
32 loam texture for all lysimeters. The particle size distribution in soil differed slightly between

33 wet and drought treatments by an increase on large particles (ANOVA,  $F = 8.807$ ,  $p = 0.041$ )  
34 and a decrease of the share of fine particles ( $< 0.002$  mm) in the top 15 cm for the wet treatment  
35 ( $3.2 \% \pm 4.4 \%$  of fine particles) compared to the drought treatment ( $9.6\% \pm 3.5\%$ , ANOVA,  $F$   
36  $= 6.224$ ,  $p = 0.067$ ).

37

## 38 **Results**

39

40 Table S1 Result of all the ANCOVAs performed.

| Variable                                                          | Effect                                                  | DFn  | DFd   | F        | p              | ges    |
|-------------------------------------------------------------------|---------------------------------------------------------|------|-------|----------|----------------|--------|
| SWC                                                               | Date                                                    | 1    | 240   | 133.974  | < <b>0.001</b> | 0.358  |
|                                                                   | Irrigation level                                        | 2    | 240   | 225.169  | < <b>0.001</b> | 0.652  |
|                                                                   | Grassland type                                          | 2    | 240   | 38.870   | < <b>0.001</b> | 0.245  |
|                                                                   | Date * Irrigation level                                 | 1    | 240   | 329.219  | < <b>0.001</b> | 0.578  |
|                                                                   | Date * Grassland type                                   | 1    | 240   | 20.028   | < <b>0.001</b> | 0.077  |
|                                                                   | Irrigation level * Grassland type                       | 1    | 240   | 51.095   | < <b>0.001</b> | 0.176  |
|                                                                   | Date * Irrigation level *<br>Grassland type             | 1    | 240   | 27.731   | < <b>0.001</b> | 0.104  |
| ET                                                                | Date                                                    | 1    | 736   | 11.336   | <b>0.001</b>   | 0.015  |
|                                                                   | Irrigation level                                        | 2    | 736   | 243.480  | < <b>0.001</b> | 0.398  |
|                                                                   | Grassland type                                          | 2    | 736   | 1.602    | 0.202          | 0.004  |
|                                                                   | Date * Irrigation level                                 | 1    | 736   | 609.696  | < <b>0.001</b> | 0.453  |
|                                                                   | Date * Grassland type                                   | 1    | 736   | 0.357    | 0.550          | 0.0005 |
|                                                                   | Irrigation level * Grassland type                       | 1    | 736   | 1.465    | 0.227          | 0.002  |
|                                                                   | Date * Irrigation level *<br>Grassland type             | 1    | 736   | 0.591    | 0.442          | 0.001  |
| Stomatal<br>conductance                                           | Date                                                    | 5    | 2450  | 188.101  | < <b>0.001</b> | 0.277  |
|                                                                   | Irrigation level                                        | 1    | 2450  | 1932.847 | < <b>0.001</b> | 0.441  |
|                                                                   | Grassland type                                          | 1    | 2450  | 18.921   | < <b>0.001</b> | 0.008  |
|                                                                   | Functional group                                        | 1    | 2450  | 457.019  | < <b>0.001</b> | 0.157  |
|                                                                   | Date * Irrigation level                                 | 4    | 2450  | 250.274  | < <b>0.001</b> | 0.29   |
|                                                                   | Date * Grassland type                                   | 5    | 2450  | 42.533   | < <b>0.001</b> | 0.08   |
|                                                                   | Irrigation level * Grassland type                       | 1    | 2450  | 28.656   | < <b>0.001</b> | 0.012  |
|                                                                   | Date * Functional group                                 | 5    | 2450  | 23.017   | < <b>0.001</b> | 0.045  |
|                                                                   | Irrigation level * Functional<br>group                  | 1    | 2450  | 143.159  | < <b>0.001</b> | 0.055  |
|                                                                   | Grassland type * Functional<br>group                    | 1    | 2450  | 6.375    | 0.120          | 0.003  |
|                                                                   | Date * Irrigation level *<br>Grassland type             | 3    | 2450  | 4.469    | <b>0.004</b>   | 0.005  |
|                                                                   | Date * Irrigation level *<br>Functional group           | 4    | 2450  | 20.68    | < <b>0.001</b> | 0.033  |
|                                                                   | Date * Grassland type *<br>Functional group             | 5    | 2450  | 6.68     | < <b>0.001</b> | 0.013  |
|                                                                   | Irrigation level * Grassland type *<br>Functional group | 1    | 2450  | 8.053    | <b>0.005</b>   | 0.003  |
| Date * Irrigation level *<br>Grassland type * Functional<br>group | 3                                                       | 2450 | 0.243 | 0.867    | 0.001          |        |
| Stomatal<br>conductance<br>legumes                                | Date                                                    | 5    | 1685  | 167.410  | < <b>0.001</b> | 0.332  |
|                                                                   | Irrigation level                                        | 1    | 1685  | 1520.418 | < <b>0.001</b> | 0.474  |
|                                                                   | Grassland type                                          | 1    | 1685  | 24.321   | < <b>0.001</b> | 0.014  |
|                                                                   | Date * Irrigation level                                 | 4    | 1685  | 202.864  | < <b>0.001</b> | 40.325 |
|                                                                   | Date * Grassland type                                   | 5    | 1685  | 37.777   | < <b>0.001</b> | 0.101  |
|                                                                   | Irrigation level * Grassland type                       | 1    | 1685  | 29.018   | < <b>0.001</b> | 0.017  |
|                                                                   | Date * Irrigation level *<br>Grassland type             | 3    | 1685  | 3.149    | <b>0.024</b>   | 0.006  |
| Stomatal<br>conductance<br>grasses                                | Date                                                    | 5    | 765   | 26.082   | < <b>0.001</b> | 0.146  |
|                                                                   | Irrigation level                                        | 1    | 765   | 426.182  | < <b>0.001</b> | 0.358  |
|                                                                   | Grassland type                                          | 1    | 765   | 0.132    | 0.717          | 0.0002 |
|                                                                   | Date * Irrigation level                                 | 4    | 765   | 41.720   | < <b>0.001</b> | 0.179  |

|                          |                                                                |   |     |         |                |       |
|--------------------------|----------------------------------------------------------------|---|-----|---------|----------------|-------|
|                          | Date * Grassland type                                          | 5 | 765 | 5.886   | < <b>0.001</b> | 0.037 |
|                          | Irrigation level * Grassland type                              | 1 | 765 | 1.423   | 0.233          | 0.002 |
|                          | Date * Irrigation level *<br>Grassland type                    | 3 | 765 | 1.698   | 0.166          | 0.007 |
| Aboveground<br>necromass | Date                                                           | 1 | 104 | 168.444 | < <b>0.001</b> | 0.618 |
|                          | irrigation level                                               | 4 | 104 | 49.135  | < <b>0.001</b> | 0.654 |
|                          | grassland type                                                 | 4 | 104 | 0.159   | 0.958          | 0.006 |
|                          | Functional group                                               | 4 | 104 | 0.325   | 0.861          | 0.012 |
|                          | Date * irrigation level                                        | 1 | 104 | 170.025 | < <b>0.001</b> | 0.620 |
|                          | Date * grassland type                                          | 1 | 104 | 0.061   | 0.806          | 0.001 |
|                          | Irrigation level * grassland type                              | 2 | 104 | 0.082   | 0.921          | 0.002 |
|                          | Date * Functional group                                        | 1 | 104 | 1.059   | 0.306          | 0.010 |
|                          | Irrigation level * Functional<br>group                         | 2 | 104 | 0.282   | 0.755          | 0.005 |
|                          | grassland type * Functional group                              | 2 | 104 | 0.053   | 0.948          | 0.001 |
|                          | Date * irrigation level * grassland<br>type                    | 1 | 104 | 0.001   | 0.977          | 0.000 |
|                          | Date * irrigation level *<br>Functional group                  | 1 | 104 | 0.242   | 0.624          | 0.002 |
|                          | Date * grassland type *<br>Functional group                    | 1 | 104 | 0.0002  | 0.987          | 0.000 |
|                          | Irrigation level * grassland type *<br>Functional group        | 1 | 104 | 0.004   | 0.949          | 0.000 |
|                          | Date * irrigation level * grassland<br>type * Functional group | 1 | 104 | 0.034   | 0.854          | 0.000 |

41

42

43 Table S2 Results of all the ANOVAs performed.

| Variable                  | Effect                                                            | Df  | Sum Sq | Mean Sq | F       | p                 |
|---------------------------|-------------------------------------------------------------------|-----|--------|---------|---------|-------------------|
| Log-aboveground phytomass | Irrigation level                                                  | 1   | 1.09   | 1.09    | 15.613  | <b>0.001</b>      |
|                           | Grassland type                                                    | 1   | 0.06   | 0.06    | 0.885   | 0.361             |
|                           | Functional group                                                  | 1   | 43.13  | 43.13   | 618.53  | <b>&lt; 0.001</b> |
|                           | Irrigation level * Grassland type                                 | 1   | 0.18   | 0.18    | 2.538   | 0.131             |
|                           | Irrigation level * Functional group                               | 1   | 4.37   | 4.37    | 62.658  | <b>&lt; 0.001</b> |
|                           | Grassland type * Functional group                                 | 1   | 0.8    | 0.8     | 11.443  | <b>0.004</b>      |
|                           | Irrigation level * Grassland type * Functional group              | 1   | 0.03   | 0.03    | 0.432   | 0.520             |
|                           | Residuals                                                         | 16  | 1.12   | 0.07    |         |                   |
| Log-belowground phytomass | Irrigation level                                                  | 1   | 4.812  | 4.812   | 30.232  | <b>&lt; 0.001</b> |
|                           | Grassland type                                                    | 1   | 0.093  | 0.093   | 0.582   | 0.457             |
|                           | Functional group                                                  | 1   | 12.474 | 12.474  | 78.371  | <b>&lt; 0.001</b> |
|                           | Irrigation level * Grassland type                                 | 1   | 0.398  | 0.398   | 2.502   | 0.133             |
|                           | Irrigation level * Functional group                               | 1   | 12.317 | 12.317  | 77.383  | <b>&lt; 0.001</b> |
|                           | Grassland type * Functional group                                 | 1   | 0.038  | 0.038   | 0.239   | 0.631             |
|                           | Irrigation level * Grassland type * Functional group              | 1   | 0.007  | 0.007   | 0.045   | 0.834             |
|                           | Residuals                                                         | 16  | 2.547  | 0.159   |         |                   |
| Root:shoot ratio          | Irrigation level                                                  | 1   | 0.212  | 0.212   | 0.296   | 0.052             |
|                           | Grassland type                                                    | 1   | 3.174  | 3.174   | 4.423   | 0.052             |
|                           | Functional group                                                  | 1   | 28.058 | 28.058  | 39.102  | <b>&lt; 0.001</b> |
|                           | Irrigation level * Grassland type                                 | 1   | 0.246  | 0.246   | 0.343   | 0.567             |
|                           | Irrigation level * Functional group                               | 1   | 3.481  | 3.481   | 4.851   | <b>0.043</b>      |
|                           | Grassland type * Functional group                                 | 1   | 3.692  | 3.692   | 5.145   | <b>0.038</b>      |
|                           | Irrigation level * Grassland type * Functional group              | 1   | 0.144  | 0.144   | 0.2     | 0.661             |
|                           | Residuals                                                         | 16  | 11.481 | 0.718   |         |                   |
| AMF spores abundance      | Irrigation level                                                  | 1   | 22.2   | 22.18   | 37.76   | <b>&lt; 0.001</b> |
|                           | Grassland type                                                    | 1   | 0      | 0.01    | 0.018   | 0.894             |
|                           | Size and pigmentation classes                                     | 8   | 750.3  | 93.79   | 159.689 | <b>&lt; 0.001</b> |
|                           | Irrigation level * Grassland type                                 | 1   | 0      | 0.02    | 0.034   | 0.853             |
|                           | Irrigation level * Size and pigmentation classes                  | 8   | 12.4   | 1.55    | 2.64    | <b>0.008</b>      |
|                           | Grassland type * Size and pigmentation classes                    | 8   | 2.8    | 0.35    | 0.588   | 0.787             |
|                           | Irrigation level * Grassland type * Size and pigmentation classes | 8   | 3.6    | 0.45    | 0.774   | 0.626             |
|                           | Residuals                                                         | 260 | 152.7  | 0.59    |         |                   |
| AMF spores evenness       | Irrigation level                                                  | 1   | 0.1    | 0.1     | 8.3     | <b>0.006</b>      |
|                           | Grassland type                                                    | 1   | 0.1    | 0.1     | 4.3     | <b>0.045</b>      |
|                           | Irrigation level * Grassland type                                 | 1   | 0.02   | 0.02    | 1.2     | 0.27              |
|                           | Residuals                                                         | 36  | 0.5    | 0.01    |         |                   |
| WUE <sub>ap</sub>         | Irrigation level                                                  | 1   | 0.352  | 0.352   | 3.894   | 0.084             |
|                           | Grassland type                                                    | 1   | 0.180  | 0.180   | 1.988   | 0.196             |
|                           | Irrigation level * Grassland type                                 | 1   | 0.557  | 0.557   | 6.157   | <b>0.038</b>      |
|                           | Residuals                                                         | 8   | 0.724  | 0.090   |         |                   |
| WUE <sub>tp</sub>         | Irrigation level                                                  | 1   | 9.929  | 9.929   | 15.994  | <b>0.004</b>      |

|                                   |   |       |       |       |       |
|-----------------------------------|---|-------|-------|-------|-------|
| Grassland type                    | 1 | 0.186 | 0.186 | 0.299 | 0.599 |
| Irrigation level * Grassland type | 1 | 2.587 | 2.587 | 4.166 | 0.075 |
| Residuals                         | 8 | 4.967 | 0.621 |       |       |

44  
45 Table S3. Varimax rotated matrix after factor analysis and the grouping factors. The identified factors  
46 were categorized depending on the variables included as follows: Factor 1 = high plant productivity,  
47 factor 2 = generally high abundance of AMF spores, factor 3 = high productivity of grasses, factor 4 =  
48 high stomatal conductance and factor 5 = high abundance of large AMF spores.

| Variables                 | Principal Components |        |        |        |        |        | Factor |
|---------------------------|----------------------|--------|--------|--------|--------|--------|--------|
|                           | 1                    | 2      | 3      | 4      | 5      | 6      |        |
| Phytomass_total_total     | 0.877                | 0.325  | -0.166 | 0.279  | 0.046  | 0.125  | 1      |
| Phytomass_total_roots     | 0.869                | 0.387  | -0.147 | 0.252  | 0.066  | 0.035  |        |
| Legumes_total_phyto       | 0.864                | 0.316  | -0.219 | 0.290  | 0.053  | 0.130  |        |
| Legumes_root_phyto        | 0.854                | 0.367  | -0.218 | 0.278  | 0.074  | 0.038  |        |
| Phytomass_total_above     | 0.844                | 0.201  | -0.189 | 0.311  | 0.008  | 0.272  |        |
| Legumes_above_phyto       | 0.839                | 0.210  | -0.210 | 0.298  | 0.013  | 0.287  |        |
| AMF_medium_black          | 0.810                | 0.364  | 0.102  | -0.089 | 0.369  | -0.188 |        |
| AMF_small_black           | 0.780                | 0.085  | -0.476 | -0.128 | 0.357  | 0.009  |        |
| ET_acc                    | 0.702                | 0.280  | -0.237 | 0.410  | 0.182  | 0.400  |        |
| Legumes_rootshoot         | 0.673                | 0.554  | -0.299 | 0.273  | 0.100  | -0.071 |        |
| AMF_big_brown             | 0.671                | 0.655  | 0.041  | 0.130  | -0.152 | 0.225  |        |
| Ratio_grass_legu_above    | -0.652               | -0.397 | 0.438  | 0.035  | 0.172  | -0.422 |        |
| AMF_small_yellow          | 0.289                | 0.911  | -0.083 | 0.041  | 0.165  | 0.105  | 2      |
| AMF_spores                | 0.313                | 0.906  | -0.124 | 0.174  | 0.115  | 0.045  |        |
| AMF_evenness              | -0.274               | -0.860 | -0.140 | 0.088  | -0.158 | -0.267 |        |
| AMF_medium_yellow         | 0.297                | 0.848  | -0.192 | 0.365  | -0.029 | -0.073 |        |
| Phytomass_total_rootshoot | 0.596                | 0.669  | 0.042  | 0.121  | 0.129  | -0.112 |        |
| Grasses_gs_lastday        | 0.408                | 0.643  | -0.310 | 0.497  | -0.014 | 0.240  |        |
| SWC_end                   | 0.357                | 0.590  | -0.261 | 0.246  | -0.162 | 0.581  |        |
| Legumes_gs_lastday        | 0.372                | 0.533  | -0.338 | 0.479  | 0.073  | 0.418  |        |
| Grasses_total_phyto       | -0.257               | -0.029 | 0.889  | -0.313 | -0.131 | -0.139 | 3      |
| Grasses_root_phyto        | -0.238               | 0.044  | 0.866  | -0.410 | -0.119 | -0.042 |        |
| AMF_small_brown           | 0.228                | -0.012 | 0.815  | 0.255  | 0.421  | 0.105  |        |
| Ratio_grass_legu_root     | -0.533               | -0.187 | 0.769  | -0.260 | -0.020 | -0.109 |        |
| Ratio_grass_legu_total    | -0.585               | -0.235 | 0.703  | -0.235 | 0.047  | -0.179 |        |
| Grasses_above_phyto       | -0.245               | -0.341 | 0.665  | 0.233  | -0.137 | -0.517 |        |
| Grasses_gs_day1           | 0.151                | 0.282  | -0.139 | 0.888  | 0.075  | 0.097  | 4      |
| Legumes_gs_day1           | 0.401                | 0.083  | -0.079 | 0.838  | 0.245  | 0.015  |        |
| AMF_medium_brown          | 0.350                | 0.454  | -0.017 | 0.787  | -0.116 | 0.115  |        |
| Grasses_rootshoot         | -0.046               | 0.391  | 0.459  | -0.687 | 0.052  | 0.307  |        |
| AMF_big_black             | 0.031                | 0.401  | 0.135  | 0.045  | 0.870  | -0.169 | 5      |
| AMF_big_yellow            | 0.339                | -0.161 | -0.336 | 0.223  | 0.724  | 0.395  |        |

49

50 Table S4 Results of linear regression analysis showing the effects of the identified factors on water use  
 51 efficiency calculated as the aboveground phytomass per accumulated evapotranspiration ( $WUE_{ap}$ ) and  
 52 as the total phytomass, i.e. aboveground and belowground, per accumulated evapotranspiration  
 53 ( $WUE_{tp}$ ).

| Model      |            | Unstandardized coefficients |            | Standardized coefficients | t      | Sig.           |
|------------|------------|-----------------------------|------------|---------------------------|--------|----------------|
|            |            | B                           | Std. error | Beta                      |        |                |
| $WUE_{tp}$ | (Constant) | 3.794                       | 0.074      |                           | 51.136 | < <b>0.001</b> |
|            | Factor 1   | 1.119                       | 0.077      | 0.883                     | 14.446 | < <b>0.001</b> |
|            | Factor 2   | 0.475                       | 0.077      | 0.375                     | 6.127  | <b>0.001</b>   |
|            | Factor 3   | -0.062                      | 0.077      | -0.049                    | -0.804 | 0.452          |
|            | Factor 4   | 0.031                       | 0.077      | 0.025                     | 0.402  | 0.701          |
|            | Factor 5   | -0.295                      | 0.077      | -0.233                    | -3.807 | <b>0.009</b>   |
| $WUE_{ap}$ | (Constant) | 1.725                       | 0.066      |                           | 26.248 | < <b>0.001</b> |
|            | Factor 1   | 0.291                       | 0.069      | 0.718                     | 4.243  | <b>0.005</b>   |
|            | Factor 2   | 0.018                       | 0.069      | 0.044                     | 0.263  | 0.801          |
|            | Factor 3   | -0.034                      | 0.069      | -0.085                    | -0.501 | 0.634          |
|            | Factor 4   | -0.058                      | 0.069      | -0.142                    | -0.838 | 0.434          |
|            | Factor 5   | -0.216                      | 0.069      | -0.533                    | -3.153 | <b>0.020</b>   |

54

## 55 References

56 Schlichting, E. and Blume, H. P.: Bodenkundliches Praktikum, 1995.

57 Thomas, G.: Soil pH and soil acidity, in: Methods of Soil Analysis, 475–490, 1996.

58
